# Supplementary material
Source: publisher site journal article supplement (https://www.dovepress.com/article/333902)
Supplement: Supplementary file 1 [file get_supplementary_file.php]

**Supporting Information**


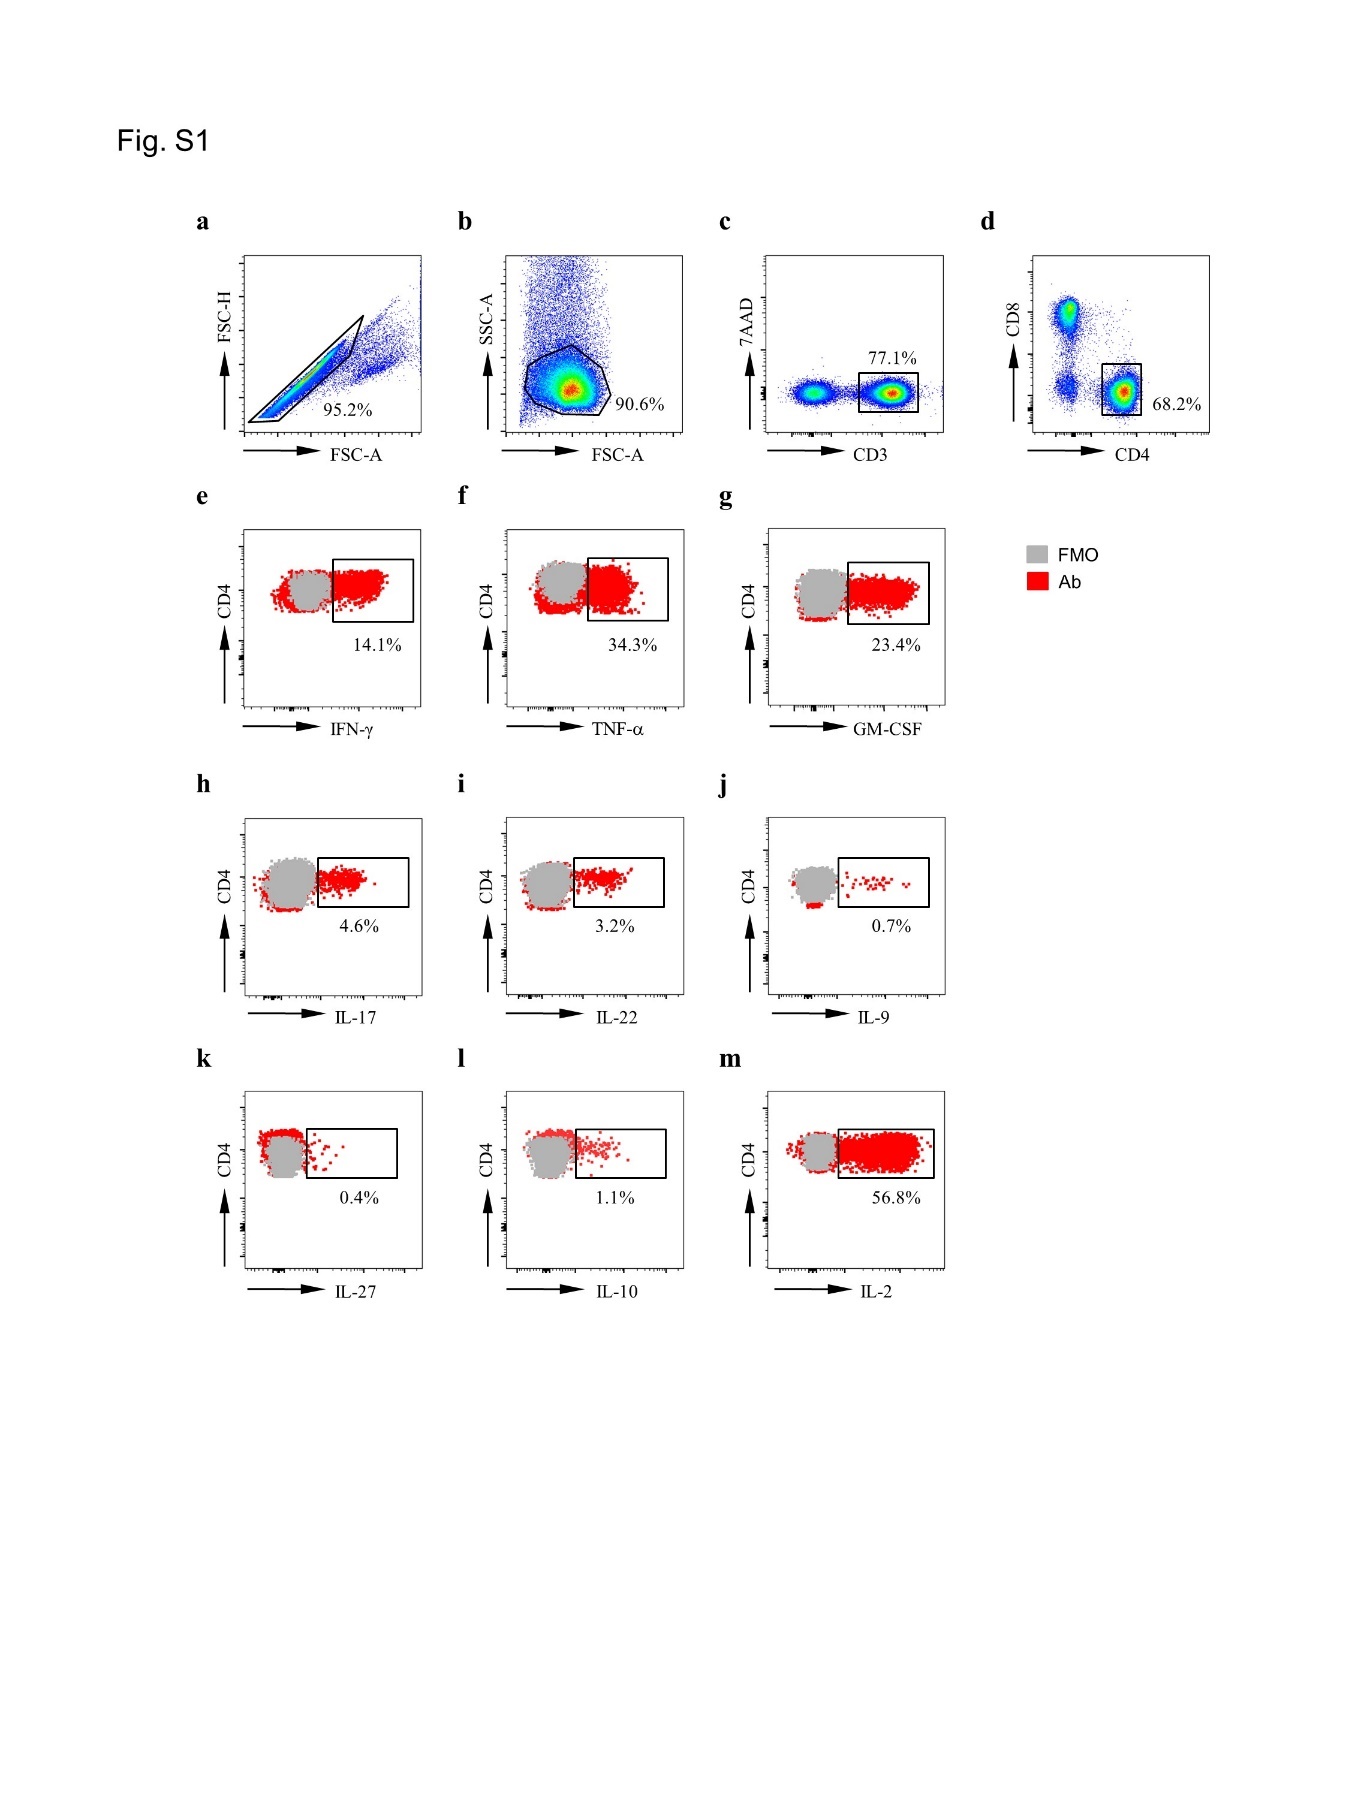


**Figure S1. Flow cytometry gating strategy for cytokine-producing CD4+ T cells from PLHIV.**

a-d. Analytic gating of flow cytometry data: single-cells were selected based on FSC-A and FSC-H (a); lymphocytes were identified from singlet cells (b); cells expressing high levels of CD3 were selected (c); CD4+ T cells were separated in CD3+ T cell population (d). e-m. Representative flow data of IFN-γ (e), TNF-α (f), GM-CSF (g), IL-17 (h), IL-22 (i), IL-9 (j), IL-27 (k), IL-10 (l), and IL-2 (m) expression (red) on CD4+ T cells and fluorescence minus one (FMO) controls (gray) from one representative PLHIV.


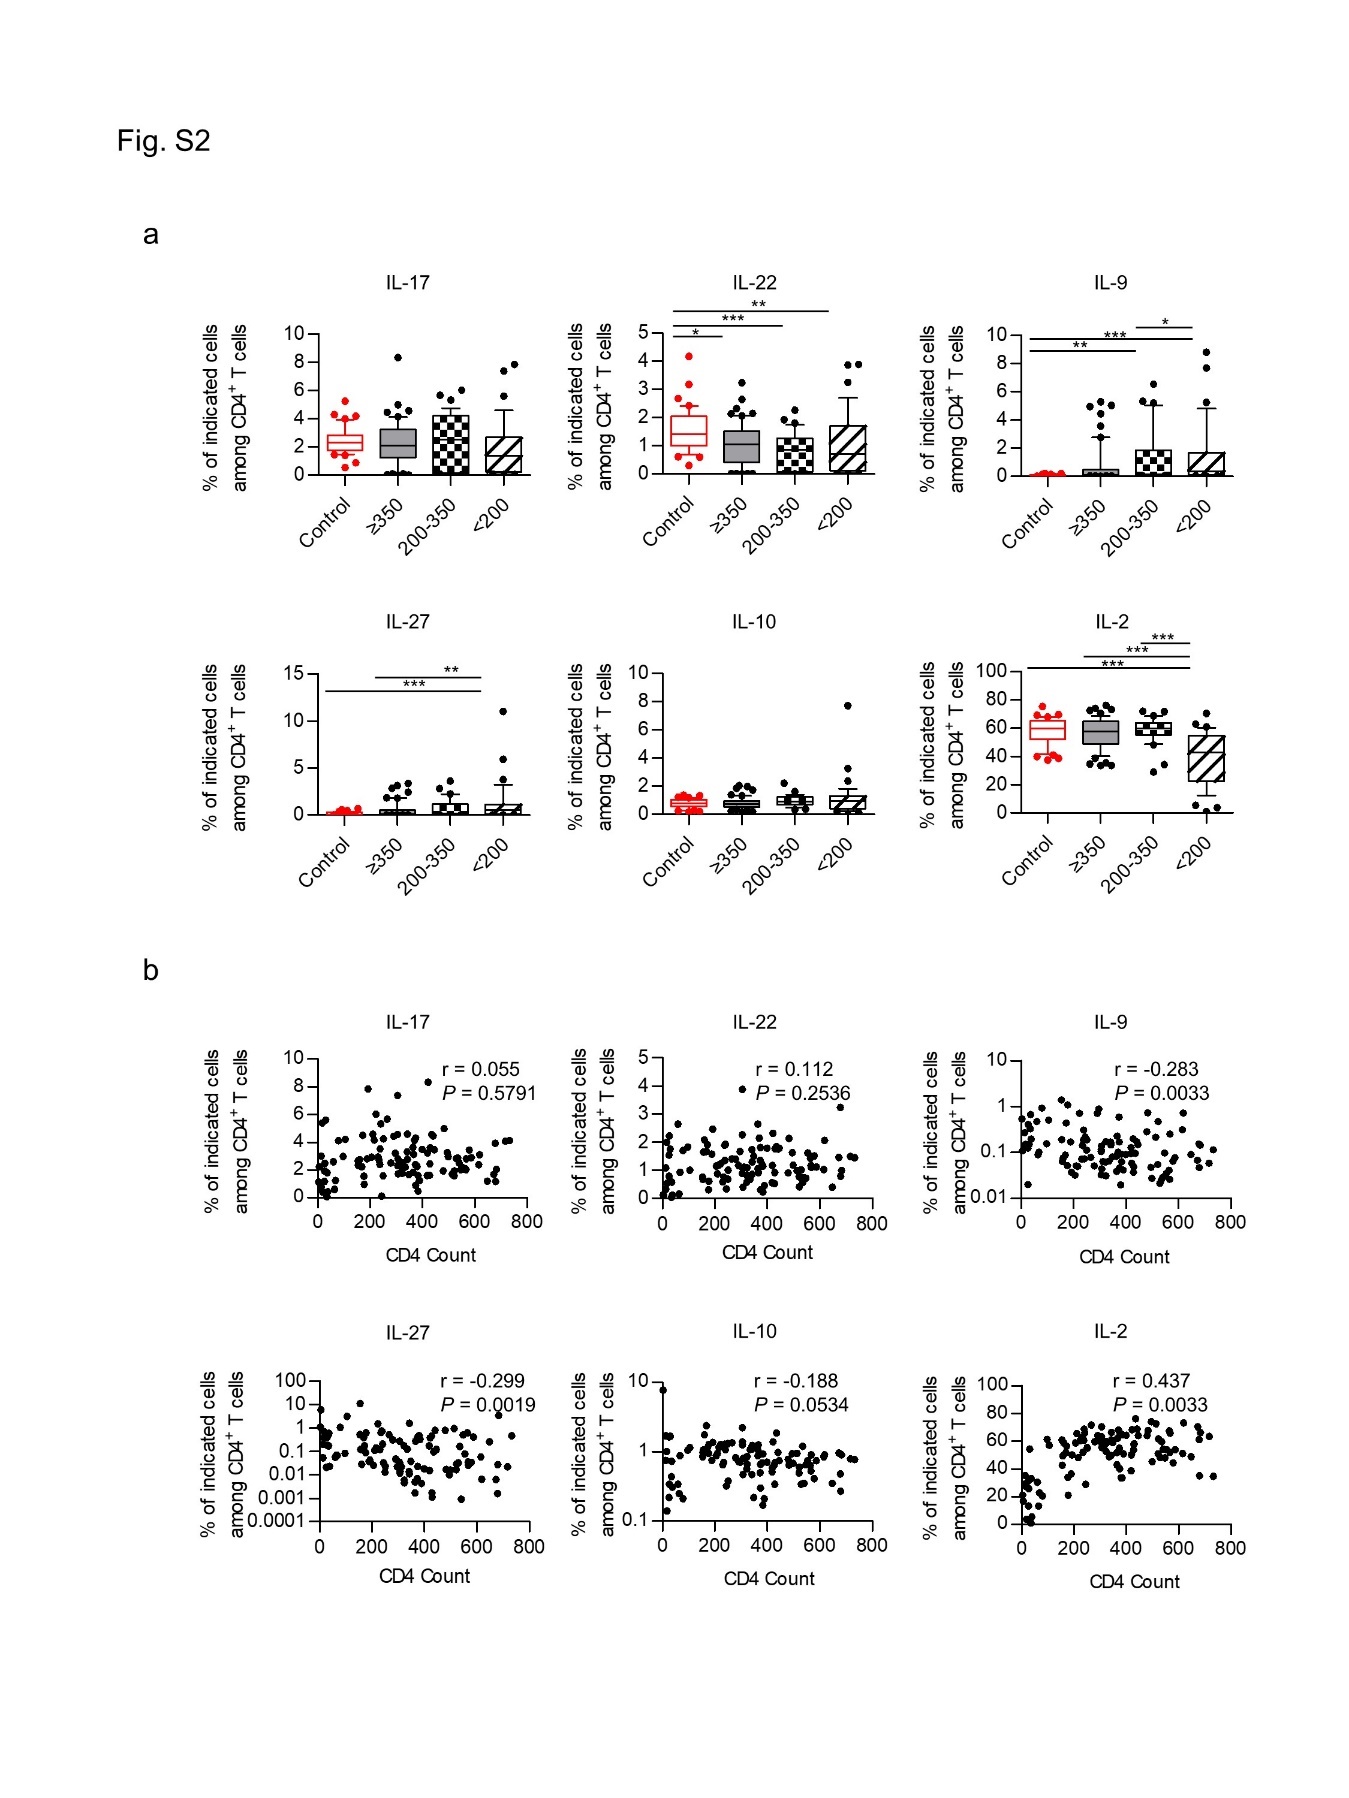


**Figure S2. The frequencies of IL-17+, IL-22+, IL-9+, IL-27+, IL-10+, IL-2+ CD4+ T cells in healthy controls and different PLHIV groups, and correlation analysis between these cells and CD4 count.**

a. Box plots of the frequencies of IL-17+, IL-22+, IL-9+, IL-27+, IL-10+ and IL-2+ CD4+ T cells from healthy controls and different PLHIV groups (CD4 count≥350 cells/µl, 200–350 cells/µl, <200 cells/µl). *P* values were obtained by Kruskal-Wallis test followed by Dunn’s multiple comparisons test. b. Correlation analysis of the percentages of cytokine-producing CD4+ T cells and CD4 count. **P* < 0.05, ***P* < 0.01, ****P* < 0.001.


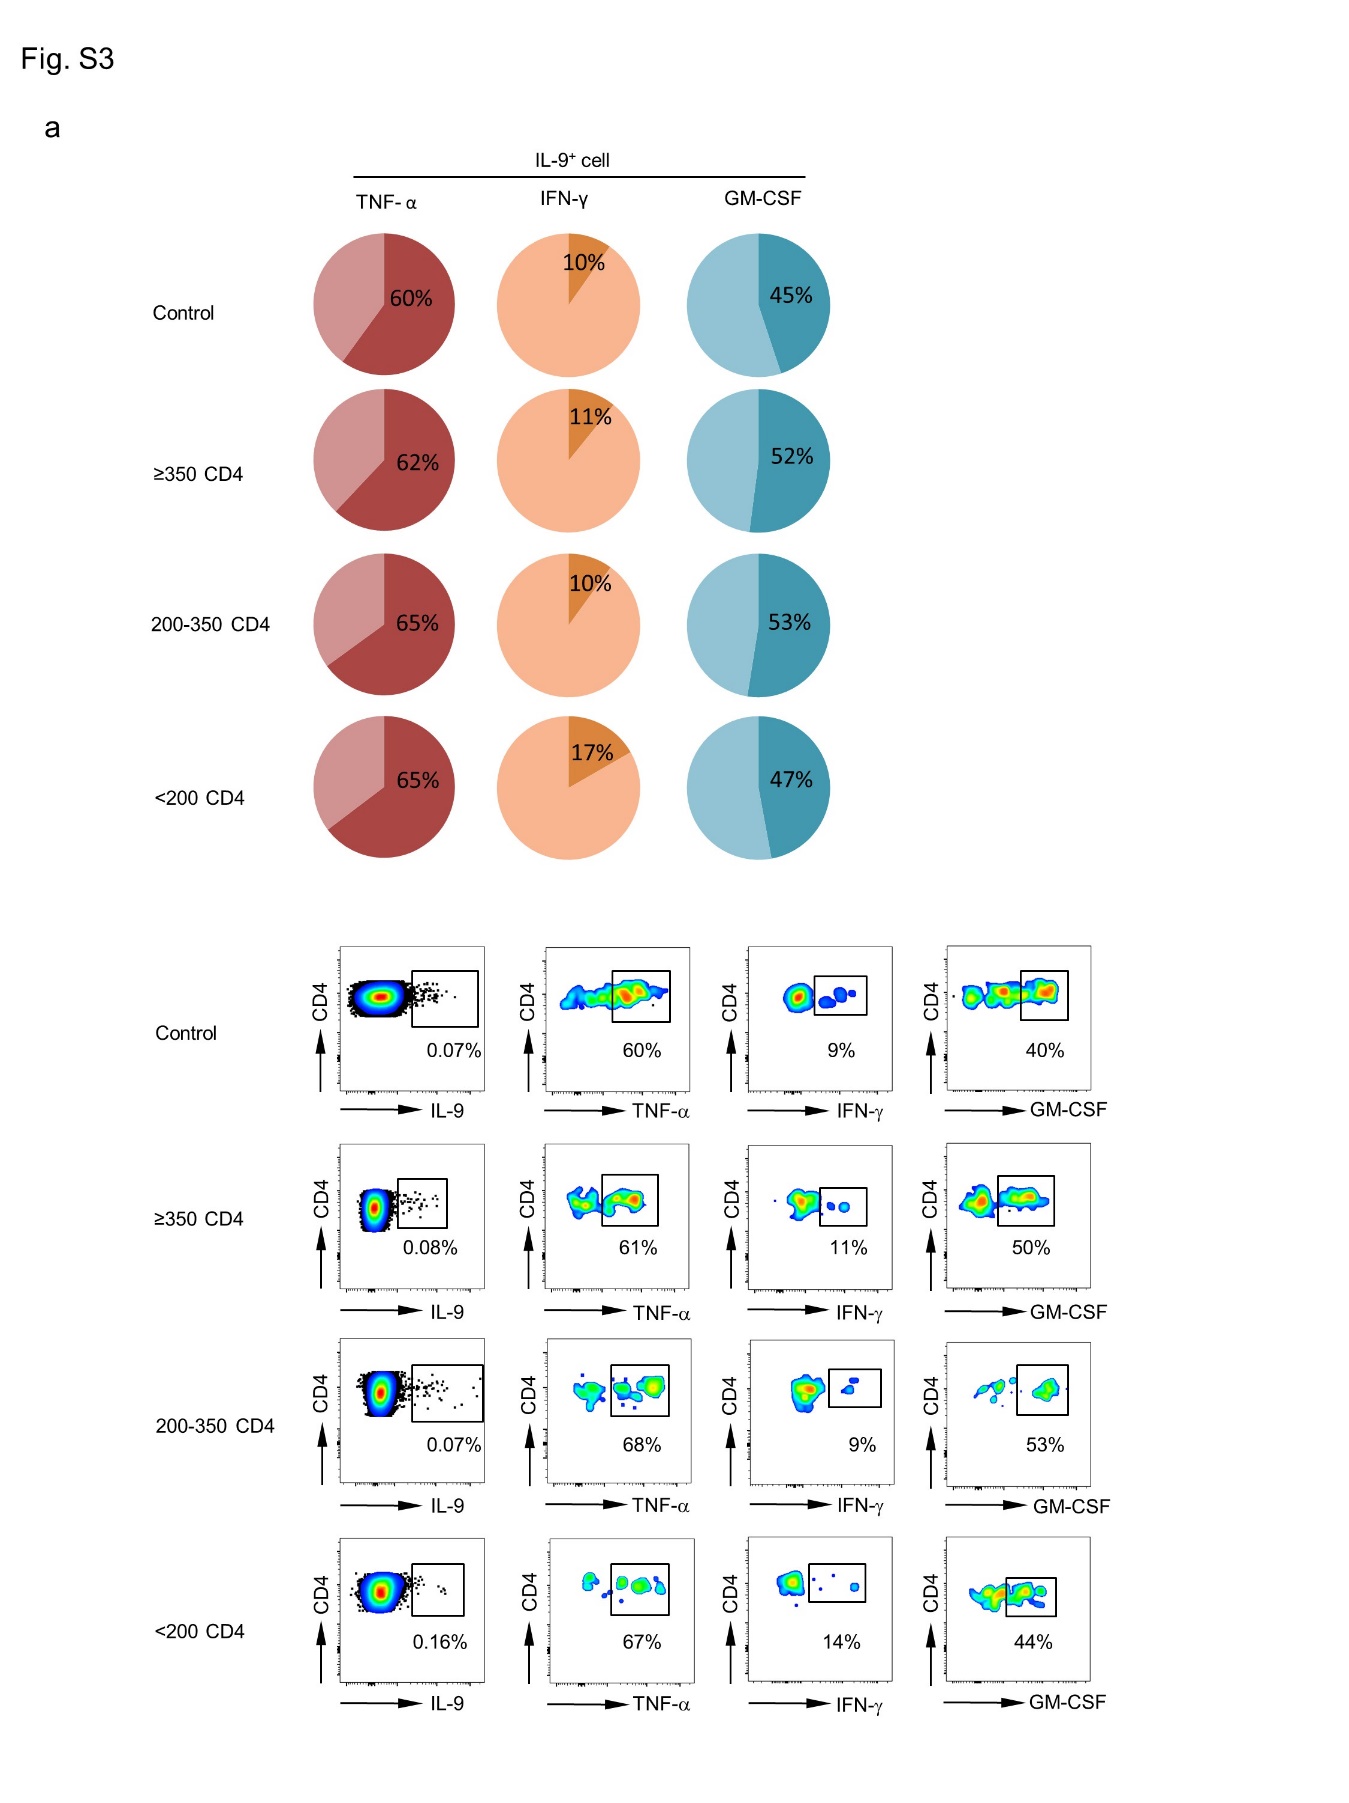

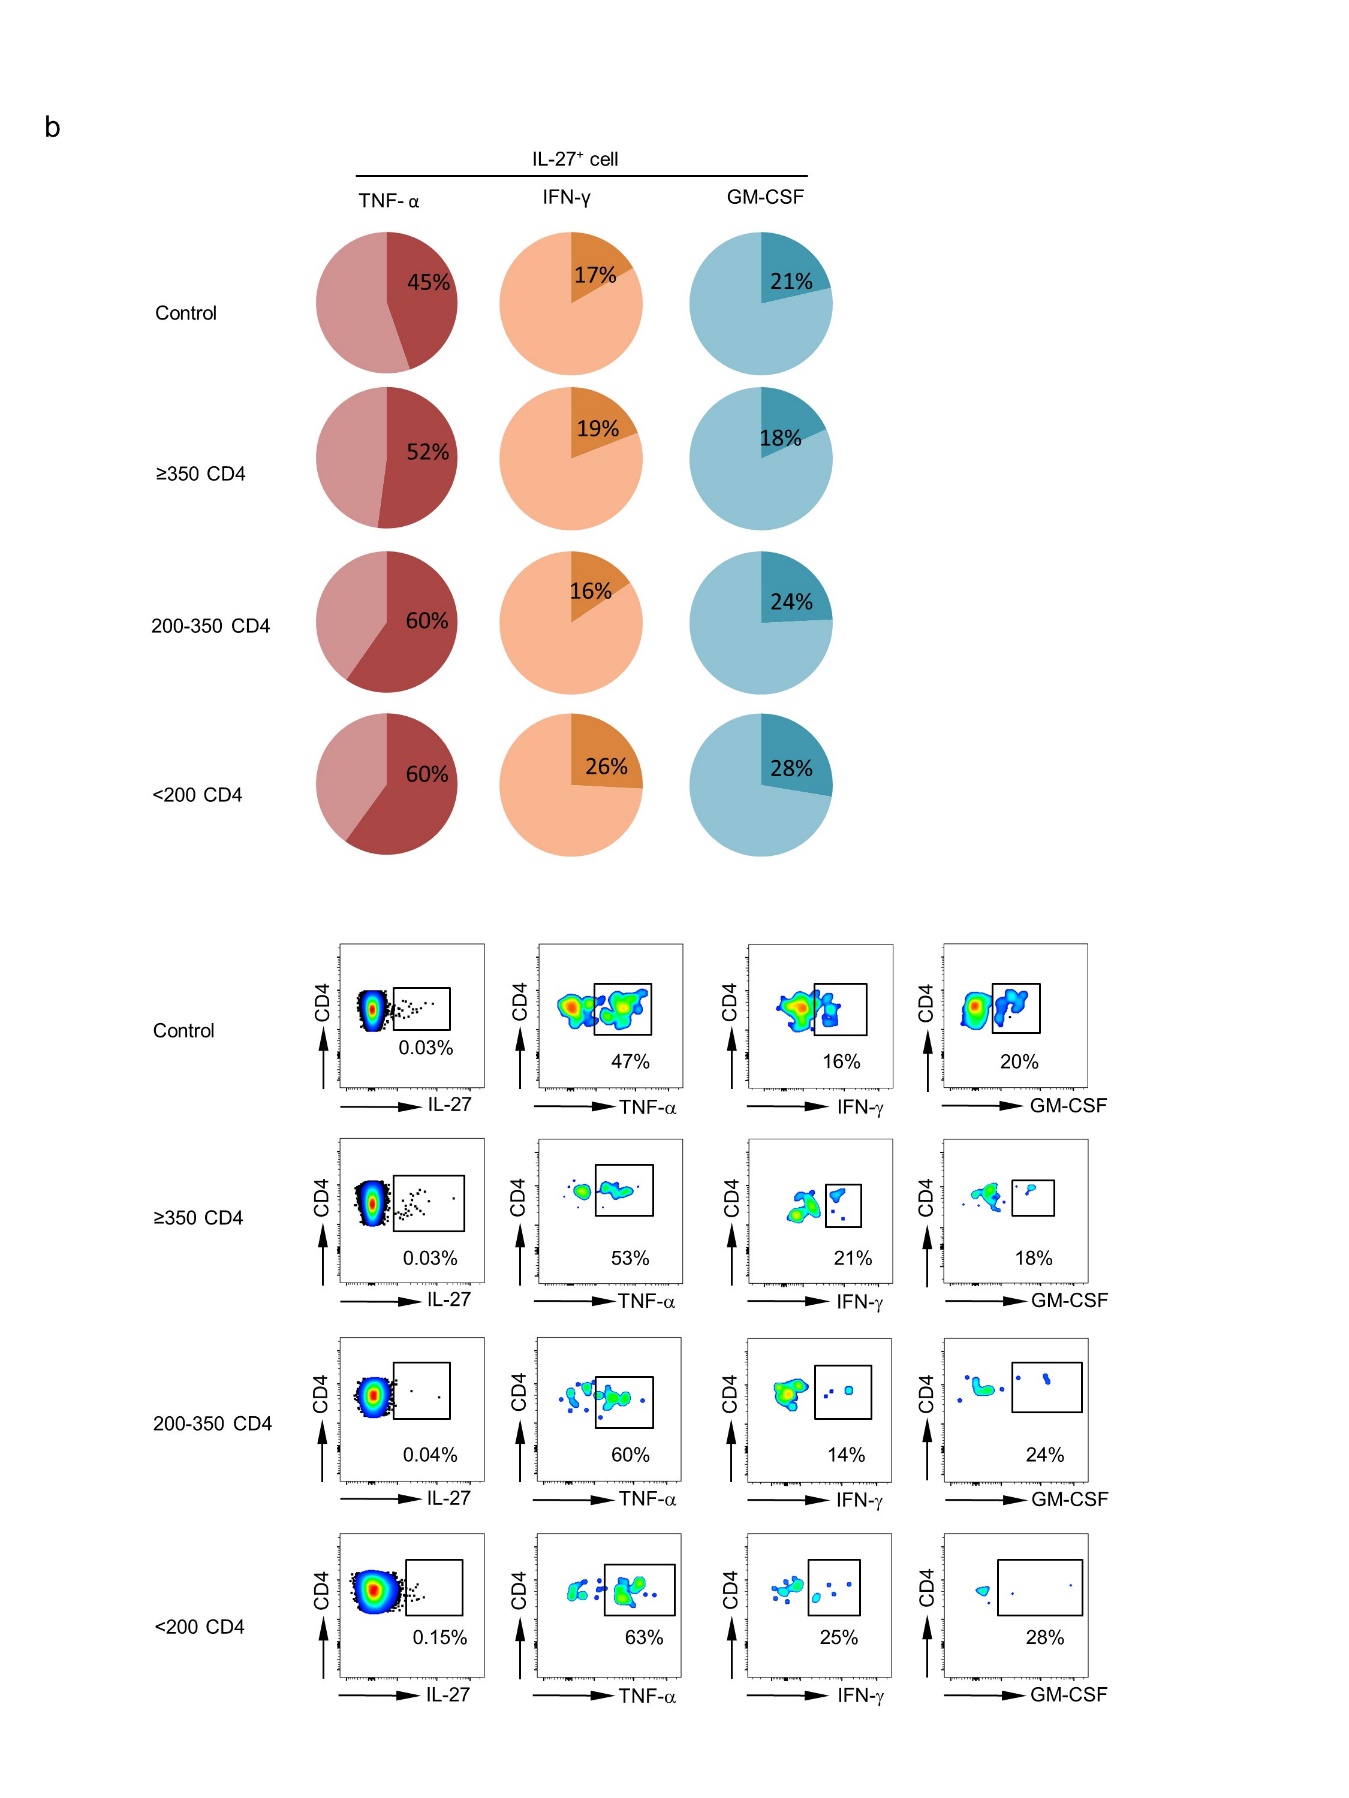


**Fig S3.** **IL-9+ and IL-27+ CD4+ T cells from healthy controls and different PLHIV groups exhibited high levels of IFN-γ, TNF-α, and GM-CSF expression.**

Pie charts and representative flow data of the percentage of IFN-γ, TNF-α, and GM-CSF expression on IL-9+ (a) or IL-27+ (b) CD4+ T cells among healthy controls and different PLHIV groups (CD4 count≥350 cells/µl, 200–350 cells/µl, <200 cells/µl).


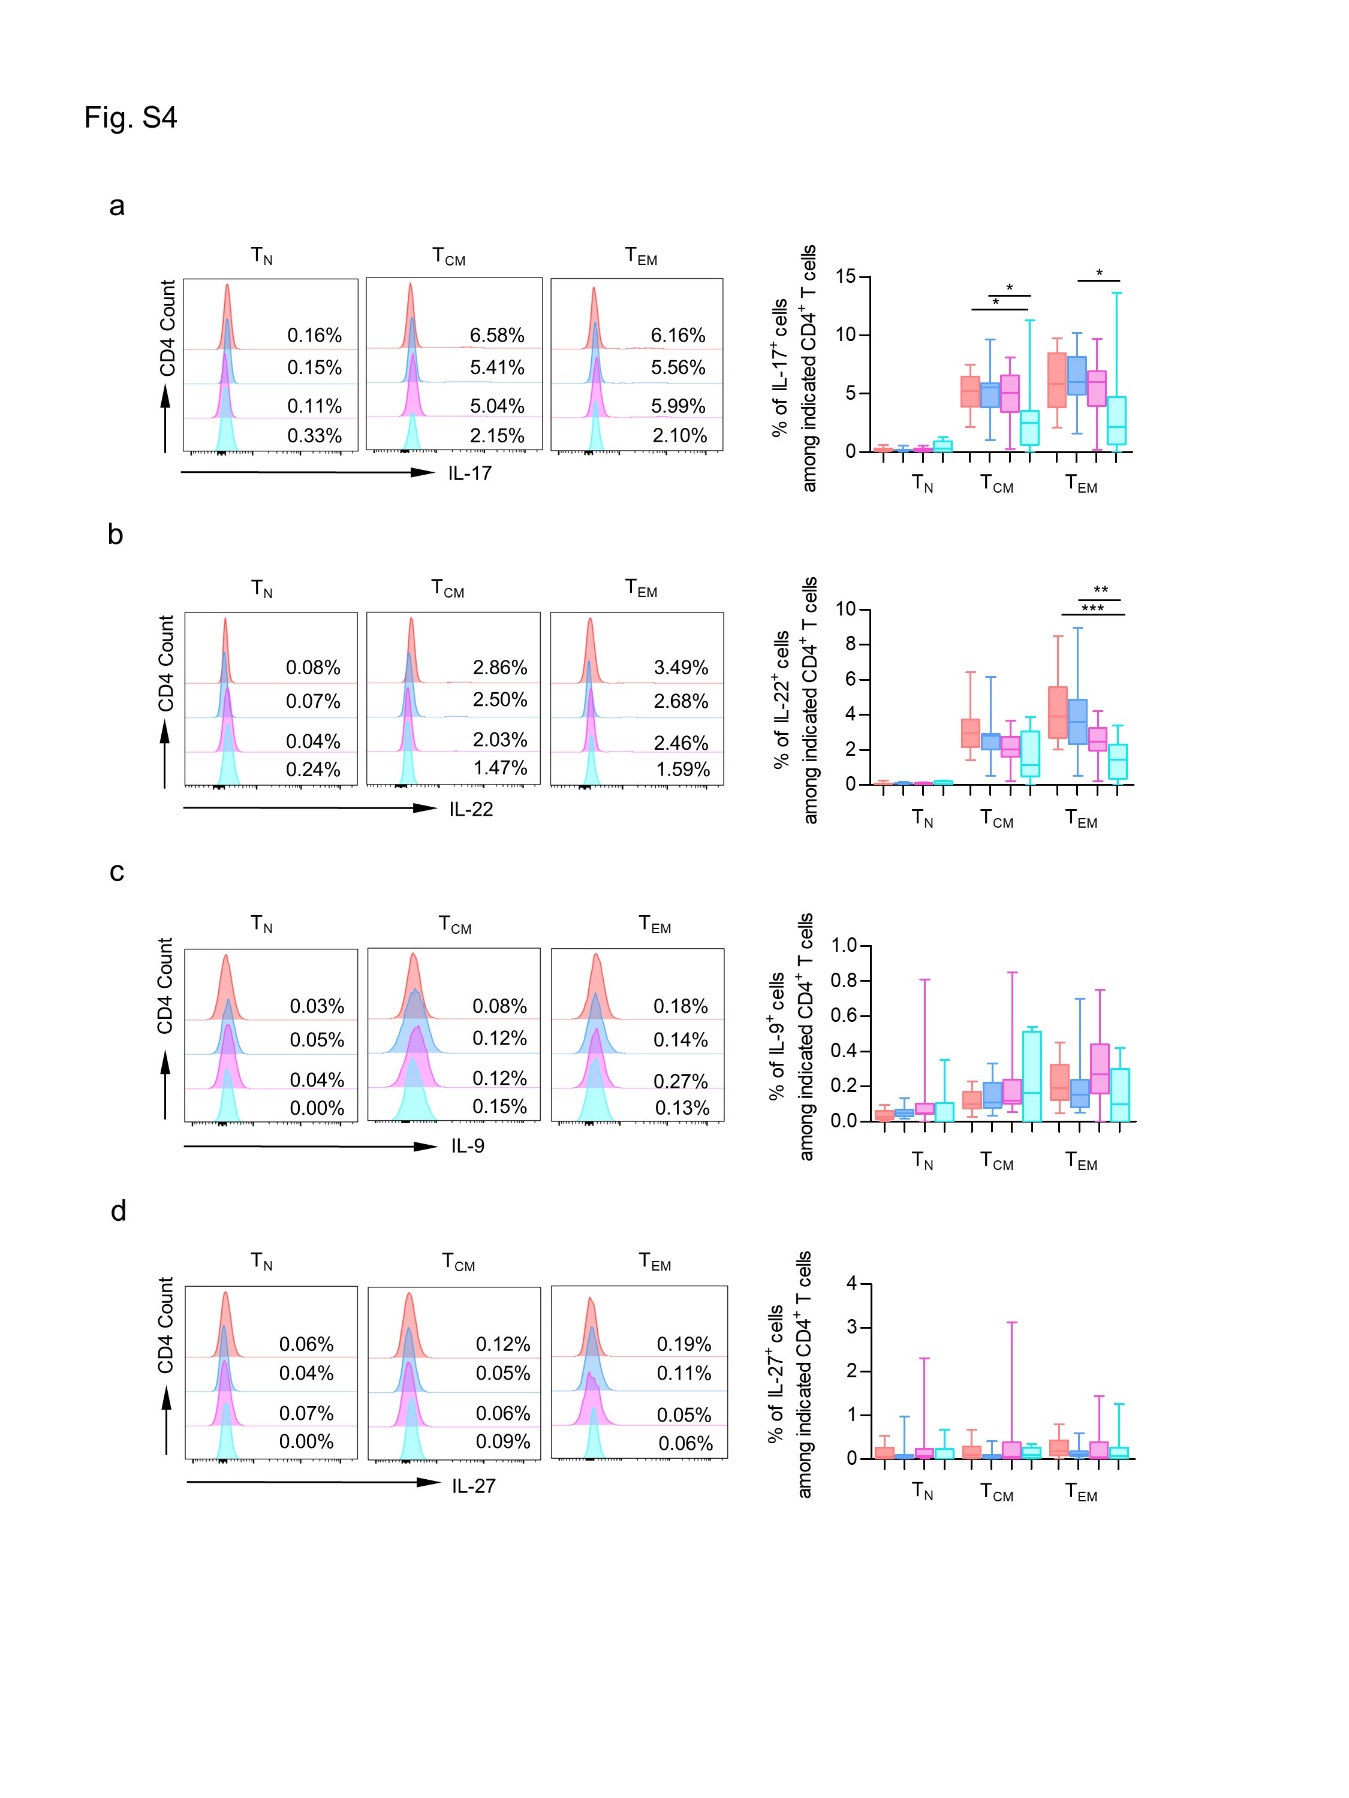

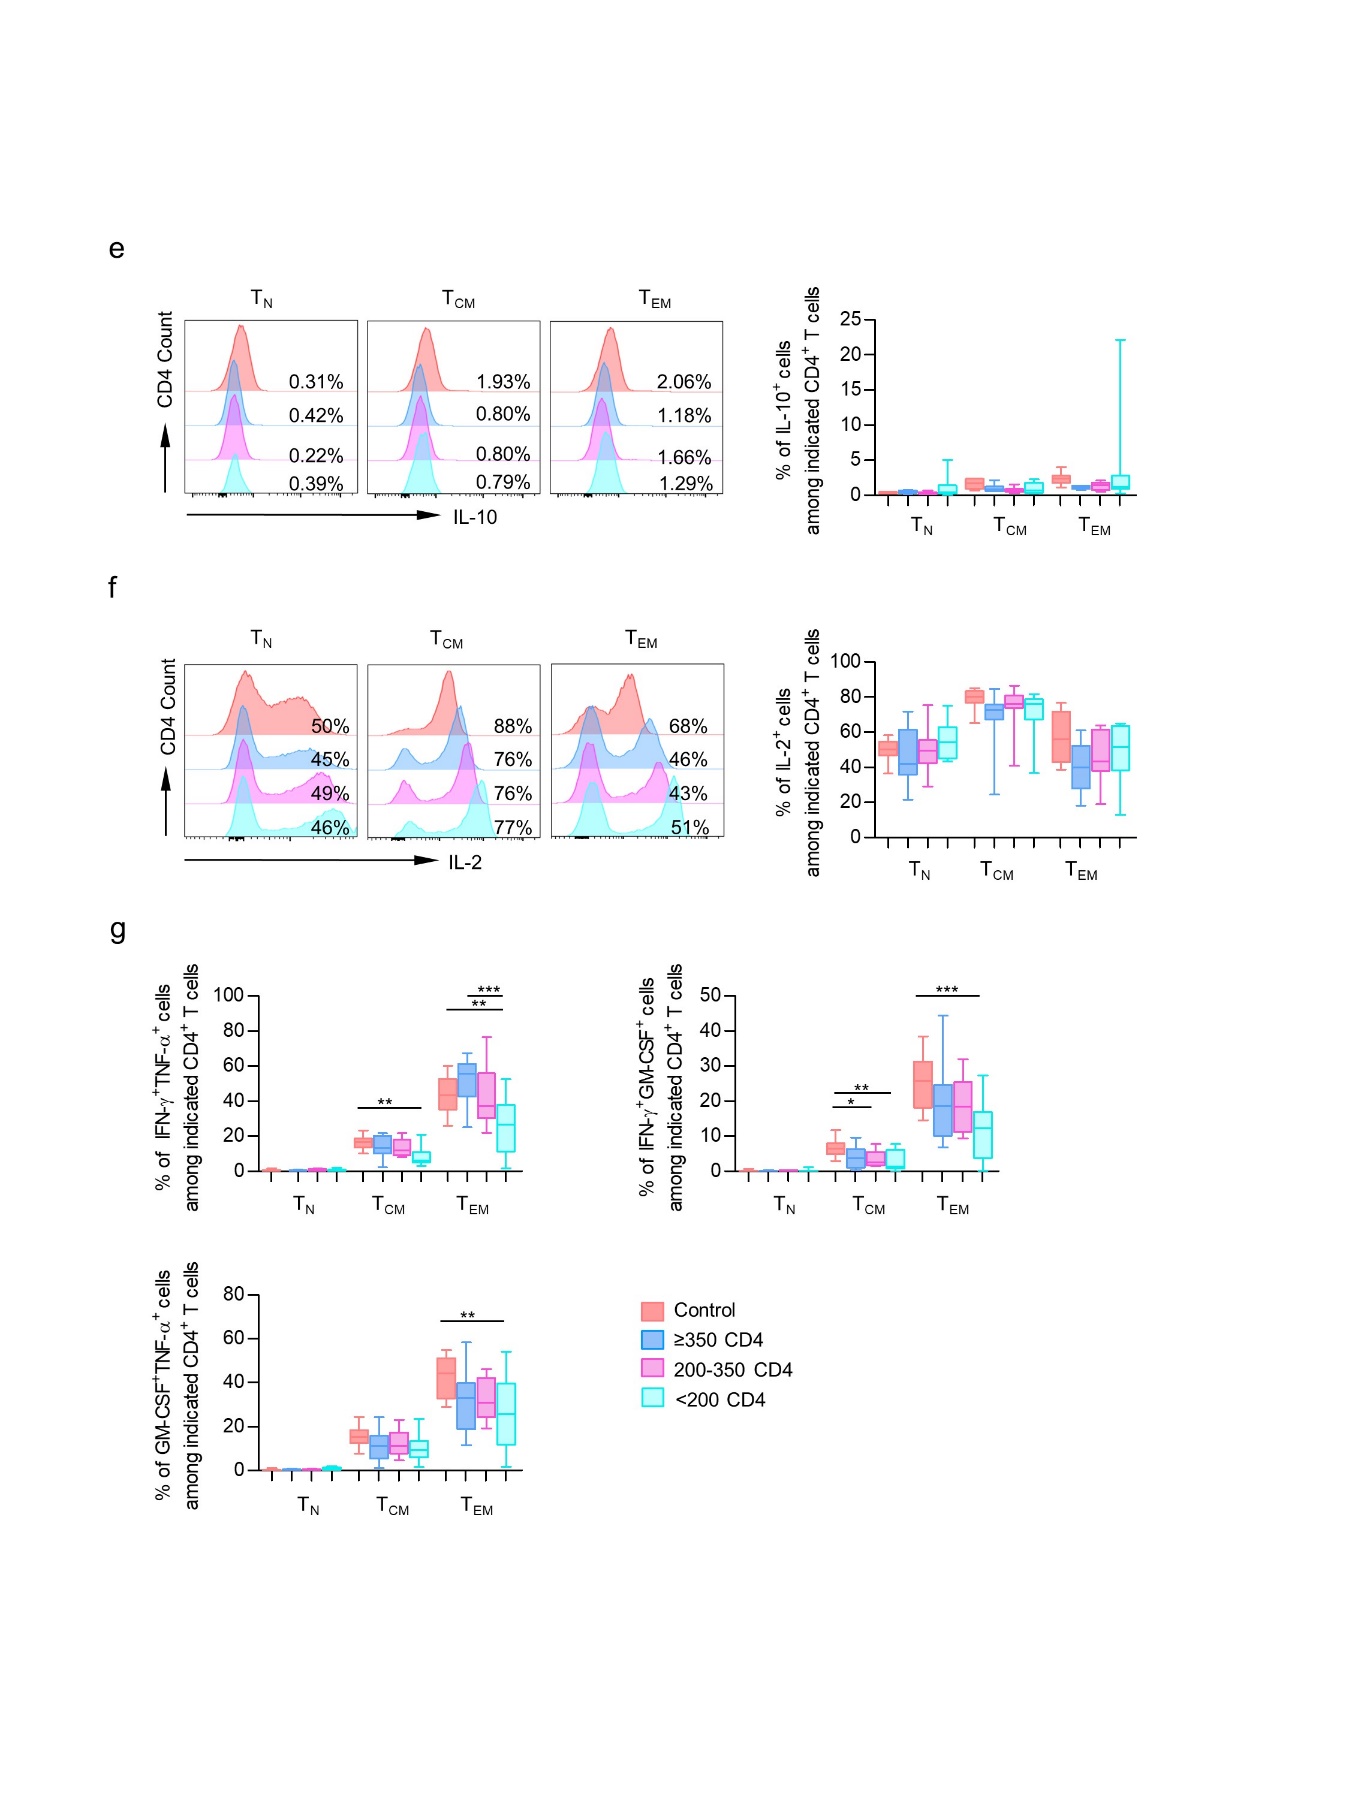


**Fig S4.** **The frequencies of CD4+ cytokine-producing cells in different CD4+ T-cell compartments among healthy controls and different PLHIV groups.**

a-f. Data were represented as histograms (left) and box plots (right) comparing median frequency in CD4+ cytokine-producing (IL-17, IL-22, IL-9, IL-27, IL-10, IL-2) cells in different CD4+ T-cell compartments (TN, TCM, TEM) among healthy controls and different PLHIV groups (CD4 count≥350 cells/µl, 200–350 cells/µl, <200 cells/µl). g. Data were represented as box plots comparing median frequency in IFN-γ, TNF-α and GM-CSF double-positive producing CD4+ T cells in different CD4+ T cell subsets among healthy controls and different PLHIV groups. *P* values were obtained by Kruskal-Wallis test followed by Dunn’s multiple comparisons test. **P* < 0.05, ***P* < 0.01, ****P* < 0.001.


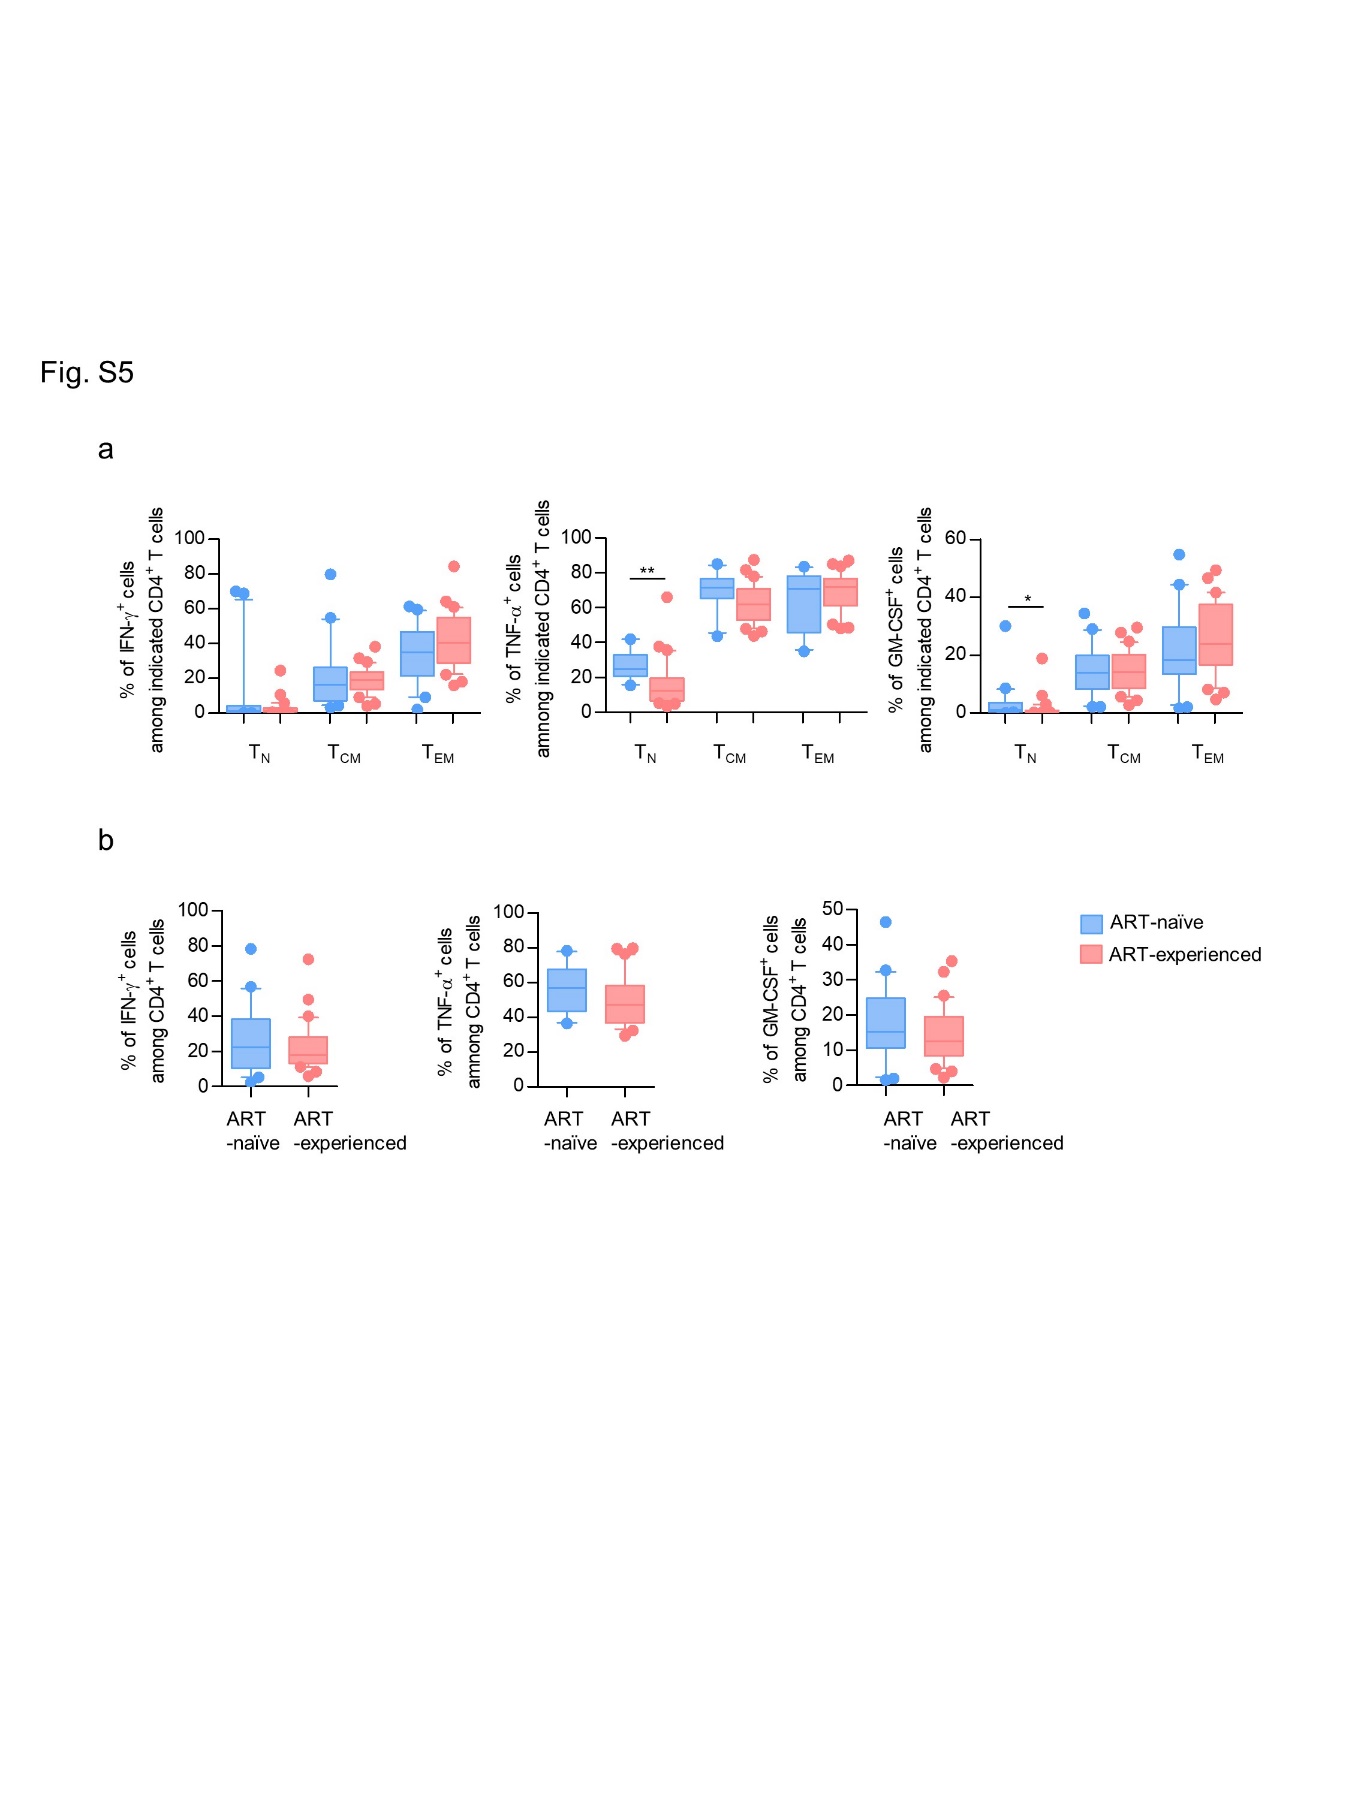


**Figure S5. ART could not alter cytokine secretion in both CD4+ T-cell subsets and total CD4+ T-cells.**

a. Box plots of the frequencies of IFN-γ+, TNF-α+, and GM-CSF+ CD4+ T cells in ART-naive subjects with CD4 cell count<200 cells/l and PLHIV who experienced 3-year ART with matched baseline CD4 cell count. *P* values were obtained by Kruskal-Wallis test followed by Dunn’s multiple comparisons test. b. The expression of IFN-γ, TNF-α, andGM-CSF in CD4+ T cells from ART-naive and ART-experienced PLHIV. *P* values were obtained by unpaired t-test. **P* < 0.05, ***P* < 0.01.

**Supplementary Table 1. Demographic and clinical characteristics of ART-naïve and ART-e****xperienced PLHIV**

| Characteristics | ART-naïve, n=20 | ART-experienced, n=34 | *P*-value |
| --- | --- | --- | --- |
| Sex (M/F) | 17/3 | 31/3 | 0.6588 |
| Age (mean, yrs) | 32±5 | 39±9 | 0.0035 |
| Transmission route |  |  |  |
| MSM | 14 | 27 | - |
| Heterosexual | 4 | 5 | - |
| Blood | 0 | 1 | - |
| Other/unknown | 2 | 1 | - |
| Nadir CD4 count (cells/mm3), median (IQR) | 66 (25-148) | 57 (21-137) | 0.5307 |
| CD4 count (cells/mm3) after ART, median (IQR) | - | 286 (212-549) | - |
| Pretreatment HIV RNA viral load (copies/mL), median (IQR) | 95608  (40058-232974) | 121850  (62422-254453) | 0.5757 |
| ART regimen  TDF+3TC+EFV  Other | -  - | 33  1 | -  - |
| Time of full virological suppression (month) | - | 6 | - |
| Time since HIV diagnosis (years), median (IQR) | - | 2.8 (2.0-3.4) | - |
